# Supplementary material for: Genetic alterations of Keap1 confers chemotherapeutic resistance through functional activation of Nrf2 and Notch pathway in head and neck squamous cell carcinoma
Source: PubMed Central journal article supplement (PMC9363464; doi:10.1038/s41419-022-05126-8), 2022-08-09

# Supplementary Figure S1

**A**

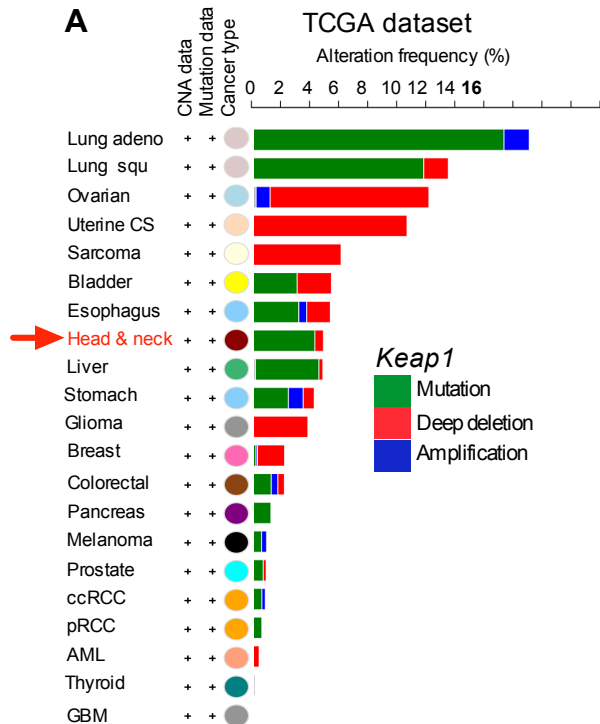

**B**

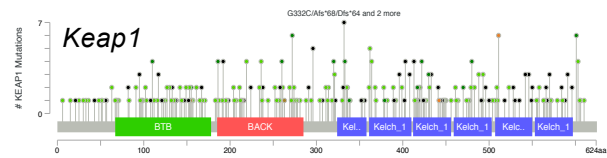

**C**

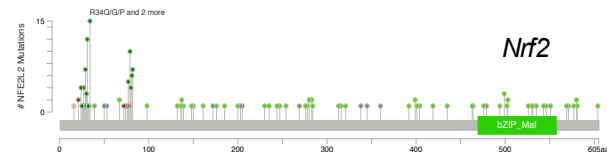

Supplement: 41419_2022_5126_MOESM2_ESM.pdf [file 41419_2022_5126_MOESM2_ESM.pdf]
